# Supplementary material
Source: HighWire-hosted journal article supplement (https://jitc.bmj.com/content/9/9/e003521)
Supplement: inline-supplementary-material-1 [file inline-supplementary-material-1.pdf]

**Supplementary Figure 1. a** Percentages for numbers of spots (each spot = CXCL10 transcript) in all CD45<sup>+</sup> CXCL10<sup>+</sup> cells on a per patient basis

**b** Percentages for numbers of spots (each dot = CXCL10 transcript) in all Sox10<sup>+</sup> CXCL10<sup>+</sup> cells on a per patient basis

**Supplementary Figure 2.** Percentage CD45<sup>+</sup> cells correlated with average number of spots per cell on a per ROI basis (95% CI).

**Supplementary Figure 3.** Percentage of CD45<sup>+</sup> CXCL10<sup>+</sup> cells correlated with Sox10<sup>+</sup> CXCL10<sup>+</sup> cells on a per patient basis.

**Supplementary Figure 4.** Percentage of all CXCL10<sup>+</sup> cells correlated with Tumor Inflamed Score (TIS), score results categorized into low -1.24 until -0.39, medium -0.39 – 0.46 and high 0.46 – 1.31 (all RNAseq scores log2-transformed) (\* = p <0.05).
